# Supplementary material for: Nanoemulsion-Based Delivery of Ricinoleic Acid Derived from Terminalia chebula: A Novel Strategy for Enhanced Bioavailability and Preclinical Constipation Management
Source: Research Square preprint supplement (doi:10.21203/rs.3.rs-7240642/v1), 2025-08-27
Supplement: Supplementary file 1 [file ed89c4ee1cf225a2b6f81fe3.docx]

**Nanoemulsion-Based Delivery of Ricinoleic Acid Derived from *Terminalia chebula*: A Novel Strategy for Enhanced Bioavailability and Preclinical Constipation Management**

**Sharmila Dusi¹** [ORCID: <https://orcid.org/0000-0003-3971-8127>] •
**J. Saminathan¹*** [ORCID: <https://orcid.org/0000-0002-8301-0663>] •
**S. Sivakalai²** [ORCID: <https://orcid.org/0000-0001-8558-0419>]

¹ Department of Pharmaceutical Chemistry, School of Pharmaceutical Sciences, Delhi Pharmaceutical Sciences and Research University, New Delhi – 110017, India
² School of Allied Health Sciences, Delhi Pharmaceutical Sciences and Research University, New Delhi – 110017, India

**Corresponding author**:
J. Saminathan
Email: [swamilingam@gmail.com](mailto:swamilingam@gmail.com)

**Graph 1.** Zero-order kinetic plots for the dissolution profiles of ricinoleic acid-loaded Nano emulsions (RCF1–RCF4).

This figure illustrates the cumulative drug release behavior of different Nano emulsion formulations, analyzed using a zero-order kinetic model.

**Graph 2.** First-order kinetic plots for the dissolution profiles of ricinoleic acid-loaded Nano emulsions (RCF1–RCF4).

The figure represents the dissolution kinetics of Nano emulsion formulations, demonstrating their drug release characteristics over time using a first-order kinetic model.

**Graph 3.** Zero-order kinetic plots for the dissolution profiles of ricinoleic acid-loaded Nano emulsions (RCF5–RCF8).

The dissolution behavior of additional formulations is presented, assessing the uniformity of drug release under a zero-order kinetic model.

**Graph 4.** First-order kinetic plots for the dissolution profiles of ricinoleic acid-loaded Nano emulsions (RCF5–RCF8).

.

The graph displays the release patterns of ricinoleic acid from Nano emulsion formulations, evaluated using first-order kinetics.

**Graph 5.** Zero-order kinetic plots for the dissolution profiles of ricinoleic acid-loaded Nano emulsions (RCF9–RCF12).

Drug release data of Nano emulsions are depicted using a zero-order kinetic model, indicating formulation stability and release consistency.

**Graph6.** First-order kinetic plots for the dissolution profiles of ricinoleic acid-loaded Nano emulsions (RCF9–RCF12).

This graph presents the dissolution patterns of Nano emulsions under first-order kinetics, highlighting differences in release rates.

**Graph7.** Zero-order kinetic plots for the dissolution profiles of ricinoleic acid-loaded Nano emulsions (RCF13–RCF17).

**Graph8.** First-order kinetic plots for the dissolution profiles of ricinoleic acid-loaded Nano emulsions (RCF13–RCF17).

This graph provides a comparative assessment of drug release kinetics following first-order dissolution modeling

**Graph 9.** Predicted versus actual response plot for Response R1..

**
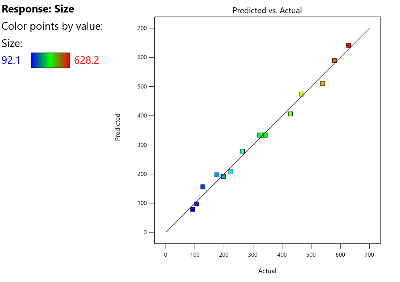
**

This graph evaluates the accuracy of the statistical model used for formulation optimization, comparing predicted and experimental values

**Graph 10.** Predicted versus actual response plot for particle size.

**
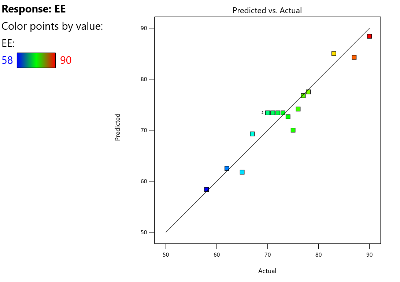
**

The graph illustrates the correlation between predicted and observed particle size values, validating the optimization model

**Graph 11.1** Contour and 3D surface plots depicting the effect of formulation variables on particle size - Contour plot illustrating the influence of factors A and B on Response R1.


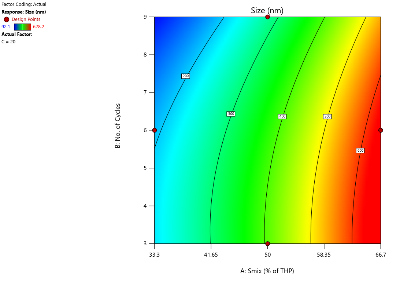


**Graph 11.2** 3D surface plot showing the impact of factors A and B on Response R1.


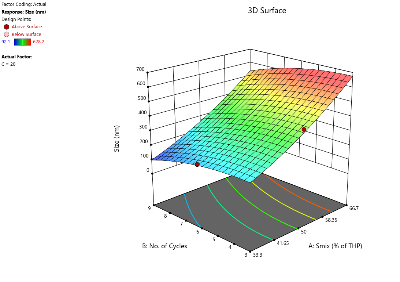


**Graph 11.3.** Contour plot representing the effect of factors A and C on Response R1.


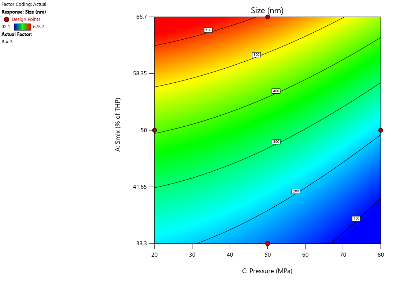


**Graph 11.4** 3D surface plot demonstrating the influence of factors A and C on Response R1.


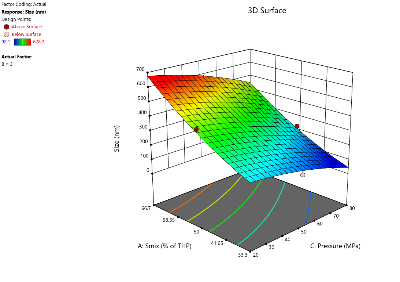


**Graph 12.** Predicted versus actual response plot for entrapment efficiency (Response R2).


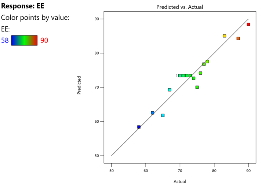


This graph evaluates the predictive accuracy of the model in estimating entrapment efficiency across different formulations.

**Graph 13.1** Contour and 3D surface plots illustrating the effect of formulation variables on entrapment efficiency- Contour plot displaying the influence of factors A and B on Response R2.


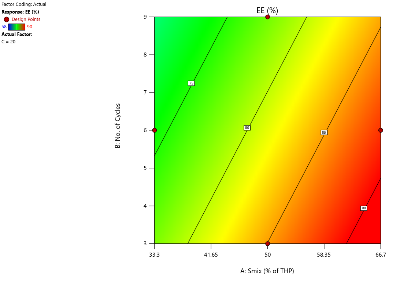


**Graph 14.** Design space optimization for ricinoleic acid Nano emulsion formulation.
This Graph illustrates the optimized formulation space derived from statistical analysis to achieve the best formulation parameters.

**
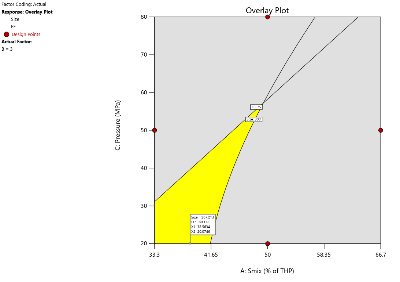
**
